# Supplementary material for: Genetic Stratigraphy of Key Demographic Events in Arabia
Source: PLoS One. 2015 Mar 4;10(3):e0118625. doi: 10.1371/journal.pone.0118625 (PMC4349752; doi:10.1371/journal.pone.0118625)
Supplement: S10 Table — (DOCX) [file pone.0118625.s048.docx]

**S10_Table** Founder lineages identified when using *f2* criterion from Africa to Arabian Peninsula, Near East and Iran.

| ***f2*** |  |  | **From Africa to Arabian Peninsula and Near East** | | |
| --- | --- | --- | --- | --- | --- |
| **Clade** | **Founder** | **HVS-I variants (-16,000)** | ***n*** | **ρ** | **se** |
| L0a | F1 | 51 188G 320 278 | 1 | 0.0000 | 0.0000 |
| F2 | 187 188A 278 | 1 | 0.0000 | 0.0000 |
| F3 | 168 293 320 | 4 | 0.0000 | 0.0000 |
| F4 | 168 278 293 | 7 | 0.5714 | 0.2857 |
| F5 | 129 188A 214 234 320 | 1 | 0.0000 | 0.0000 |
| F6 | 168 287 | 1 | 0.0000 | 0.0000 |
| F7 | 114A 168 293 | 1 | 0.0000 | 0.0000 |
| F8 | 168 287 293 | 1 | 0.0000 | 0.0000 |
| F9 | 168 320 | 1 | 0.0000 | 0.0000 |
| F10 | 168 278 | 1 | 0.0000 | 0.0000 |
| F11 | 129 | 21 | 0.2857 | 0.1782 |
| F12 | 168 | 10 | 0.4000 | 0.2000 |
| F13 | root | 5 | 2.0000 | 0.7483 |
| L0b | F14 | root | 1 | 0.0000 | 0.0000 |
| L0d | F15 | 290 300 399 | 1 | 0.0000 | 0.0000 |
| L0f | F16 | 52 290 354 325 | 1 | 0.0000 | 0.0000 |
| L0k | F17 | 223 291A | 2 | 0.0000 | 0.0000 |
| L1b | F18 | 239 | 2 | 0.5000 | 0.5000 |
| F19 | 289 | 1 | 0.0000 | 0.0000 |
| F20 | 293 | 1 | 0.0000 | 0.0000 |
| F21 | root | 5 | 0.2000 | 0.2000 |
| L1c2 | F22 | 71 145 213 234 | 2 | 0.0000 | 0.0000 |
| F23 | 78 278 320 | 2 | 1.0000 | 0.7071 |
| L1c | F24 | 187 274 368 | 2 | 0.0000 | 0.0000 |
| L1c3a | F25 | 360 | 1 | 0.0000 | 0.0000 |
| F26 | root | 2 | 1.0000 | 0.7071 |
| L2a1 | F27 | 92 189 286 | 2 | 0.0000 | 0.0000 |
| F28 | 189 286 | 8 | 0.1250 | 0.1250 |
| F29 | 189 234 249 295 309 | 1 | 0.0000 | 0.0000 |
| F30 | 93 192 309 | 2 | 0.0000 | 0.0000 |
| F31 | 189 209 301 309 354 | 3 | 0.0000 | 0.0000 |
| F32 | 92 192 | 1 | 0.0000 | 0.0000 |
| F33 | 192 292 | 9 | 0.1111 | 0.1111 |
| F34 | 189 192 | 5 | 0.0000 | 0.0000 |
| F35 | 192 309 | 5 | 0.4000 | 0.2828 |
| F36 | 93 192 | 2 | 0.0000 | 0.0000 |
| F37 | 189 309 | 3 | 0.6667 | 0.4714 |
| F38 | 129 189 | 4 | 0.0000 | 0.0000 |
| F39 | 239 | 2 | 1.0000 | 0.7071 |
| F40 | 309 | 2 | 1.0000 | 0.7071 |
| F41 | 192 | 7 | 0.8571 | 0.5345 |
| F42 | 290 | 2 | 0.0000 | 0.0000 |
| F43 | 193 | 1 | 0.0000 | 0.0000 |
| F44 | 344 | 1 | 0.0000 | 0.0000 |
| F45 | 189 | 5 | 0.4000 | 0.2828 |
| F46 | root | 6 | 1.0000 | 0.4082 |
| L2b | F47 | 355 362 | 2 | 0.0000 | 0.0000 |
| F48 | 145 | 2 | 0.0000 | 0.0000 |
| F49 | 362 | 1 | 0.0000 | 0.0000 |
| L2d | F50 | root | 2 | 0.0000 | 0.0000 |
| L2e | F51 | root | 1 | 0.0000 | 0.0000 |
| L2* | F52 | 264 | 3 | 2.3333 | 1.2019 |
| L3b | F53 | 124 | 4 | 0.5000 | 0.3536 |
| F54 | 311 | 1 | 0.0000 | 0.0000 |
| F55 | 93 | 10 | 0.0000 | 0.0000 |
| F56 | root | 12 | 0.0833 | 0.0833 |
| L3d | F57 | 189 278 304 311 | 3 | 0.0000 | 0.0000 |
| F58 | 256 368 | 1 | 0.0000 | 0.0000 |
| F59 | 300 319 | 1 | 0.0000 | 0.0000 |
| F60 | 256 | 1 | 0.0000 | 0.0000 |
| F61 | 319 | 18 | 0.0556 | 0.0556 |
| F62 | root | 2 | 0.5000 | 0.5000 |
| L3e | F63 | 172 189 320 | 2 | 0.0000 | 0.0000 |
| F64 | 185 209 327 | 4 | 0.2500 | 0.2500 |
| F65 | 51 264 | 1 | 0.0000 | 0.0000 |
| F66 | 265T | 16 | 0.1875 | 0.1398 |
| F67 | 327 | 10 | 0.5000 | 0.2646 |
| L3f | F68 | 292 295 | 1 | 0.0000 | 0.0000 |
| F69 | 292 | 14 | 0.8571 | 0.4286 |
| F70 | 189 292 | 1 | 0.0000 | 0.0000 |
| F71 | 111A | 1 | 0.0000 | 0.0000 |
| F72 | root | 4 | 1.2500 | 0.5590 |
| L3x | F73 | 223 278 298 311 | 1 | 0.0000 | 0.0000 |
| F74 | 223 278 | 19 | 0.2105 | 0.1053 |
| F75 | 86 193 195 | 3 | 0.6667 | 0.6667 |
| F76 | 193 195 | 1 | 0.0000 | 0.0000 |
| L3* | F77 | 148 192 | 4 | 0.0000 | 0.0000 |
| F78 | 111 184 304 311 | 3 | 1.0000 | 0.5774 |
| F79 | 311 | 1 | 0.0000 | 0.0000 |
| F80 | root | 5 | 0.6000 | 0.6000 |
| L4 | F81 | 207T 220 260 261 | 2 | 0.0000 | 0.0000 |
|  | F82 | 93 207T 260 | 1 | 0.0000 | 0.0000 |
|  | F83 | 207T 260 261 | 2 | 0.0000 | 0.0000 |
|  | F84 | 189 179 239 320 | 1 | 0.0000 | 0.0000 |
|  | F85 | 172 293T 355 399 | 1 | 0.0000 | 0.0000 |
|  | F86 | 274 293T 355 399 | 1 | 0.0000 | 0.0000 |
|  | F87 | 207T 260 | 1 | 0.0000 | 0.0000 |
|  | F88 | 293T 355 399 | 2 | 1.0000 | 0.7071 |
|  | F89 | 260 | 2 | 0.5000 | 0.5000 |
|  | F90 | root | 1 | 0.0000 | 0.0000 |
| L5 | F91 | 111 254 311 360 | 1 | 0.0000 | 0.0000 |
| F92 | 355 362 | 5 | 0.2000 | 0.2000 |
| L6 | F93 | 173 362 | 12 | 0.0000 | 0.0000 |
| F94 | 362 | 1 | 0.0000 | 0.0000 |
| F95 | root | 1 | 0.0000 | 0.0000 |
